# Supplementary material
Source: PubMed Central journal article supplement (PMC2823501)
Supplement: supp_M109.066431_jbc.M109.066431-2.pdf [file supp_M109.066431_jbc.M109.066431-2.pdf]

| <b>Gene</b>                | <b>Forward primer<br/>Reverse primer</b>                            | <b>Probe</b>                |
|----------------------------|---------------------------------------------------------------------|-----------------------------|
| <b>SAFB1</b>               | CCCGAAGATGACTCGGATACAA<br>TGTAGAAGAGAGTCCACTAACCCAGAA               | ACCACAACCTGCTGCGACCCTTTTCCT |
| <b>SAFB2</b>               | GATCTCAAGAACCTTTTCAGCAAGTAT<br>TCGACATGGTGACGAATCCA                 | CCAAAGTGGTAACGAACGCCCGC     |
| <b>pS2</b>                 | CCTCCCAGTGTGCAAATAAGG<br>TCTTCTGGAGGGACGTCGAT                       | CTGCTGTTTTCGACGACACCGTTG    |
| <b>β-Actin</b>             | CCCTGGCACCCAGCAC<br>GCCGATCCACACGGAGTAC                             | ATCAAGATCATTGCTCCTCCTGAGCGC |
| <b>pS2</b>                 | GGCAGGCTCTGTTTGCTTAAAGAGGTTAGATA<br>GGCCATCTCTCACTATGAATCACTTCTGCAG | *                           |
| <b>hsp27</b>               | GTTCCAGATGAGGGCTGAAC<br>TCTGGACGTCTGCTCAGAAA                        | *                           |
| <b>FRAT1</b>               | GGAAGAAACCAACAGGGTTCA<br>GGTTGATTTGTAAACAATGGGTGA                   | *                           |
| <b>OPG</b>                 | GATTAGTTTTCTCCAAGGTCTGACA<br>ACTCCAAATCACTCCTTGTATTTG               | *                           |
| <b>BBC3</b>                | CCTGGAGGGTCCTGTACAATCT<br>GCACCTAATTGGGCTCCATCT                     | *                           |
| <b>BBC3 1.5kb promoter</b> | TGTGGCCTTGTGTCTGTGAG<br>GTTCCAGGGTCCACAAAGTC                        | *                           |

Suppl. Data, Table 1 Hammerich-Hille
